# Supplementary material
Source: PubMed Central journal article supplement (PMC6544863)
Supplement: supp_RA119.007885_143571_1_supp_305771_p7z7dr.pdf [file supp_RA119.007885_143571_1_supp_305771_p7z7dr.pdf]

**Multi-omics analysis unravels a segregated metabolic flux network that tunes co-utilization of sugar and aromatic carbons in *Pseudomonas putida***

Matthew A. Kukurugya<sup>‡,1</sup>, Caroll M. Mendonca<sup>‡,1</sup>, Mina Solhtalab<sup>‡</sup>, Rebecca A. Wilkes<sup>‡</sup>, Theodore W. Thannhauser<sup>§</sup>, and Ludmilla Aristilde<sup>‡,2</sup>

From the <sup>‡</sup>Department of Biological and Environmental Engineering, College of Agriculture and Life Sciences, Cornell University, Ithaca, NY 14853, USA. <sup>§</sup>United States Department of Agriculture—Agricultural Research Service, Ithaca, NY 14853, USA.

<sup>1</sup>Co-first authors

<sup>2</sup>To whom correspondence should be addressed: 214 Riley-Robb Hall, Cornell University, Ithaca, NY 14850; Tel. (607) 255-6845; Fax. (607) 255-4449; ludmilla@cornell.edu

Running title: *Segregated metabolism for mixed-substrate usage in P. putida*

**Keywords:** *Pseudomonas*, bacterial metabolism, metabolomics, proteomics, glucose, benzoate, mixed carbon metabolism

**SUPPLEMENTARY INFORMATION**

**Appendix A**

Supplementary Figure 1

Supplementary Figure 2

**Appendix B**

Supplementary Figure 3

**Appendix C**

Supplementary Table 1

**Appendix D**

Supplementary Table 2

Supplementary Table 3

**Appendix E**

Supplementary Table 4

**Appendix F**

Supplementary Figure 4

**Appendix G**

Supplementary Figure 5

Supplementary Figure 6

## Appendix A

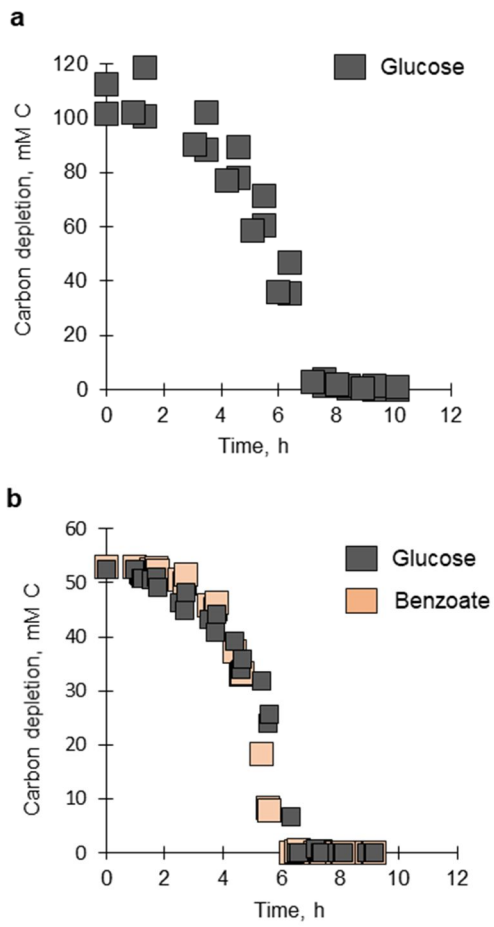

Supplementary Figure 1. Kinetics of extracellular depletion by *P. putida* KT2440 grown on (A) glucose alone or (B) both glucose and benzoate.

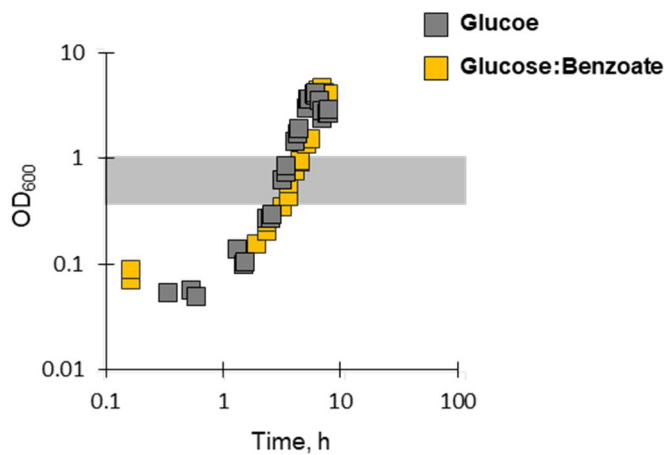

Supplementary Figure 2. Growth curves of *P. putida* KT2440 cells on glucose alone (dark gray) or both glucose and benzoate (light orange). The light gray box indicates the OD values, which were chosen to obtain exponentially-growing cells for retrieve metabolomics data (0.5 and 1.1 ODs) and proteomics data (0.5-0.7 ODs).

## Appendix B

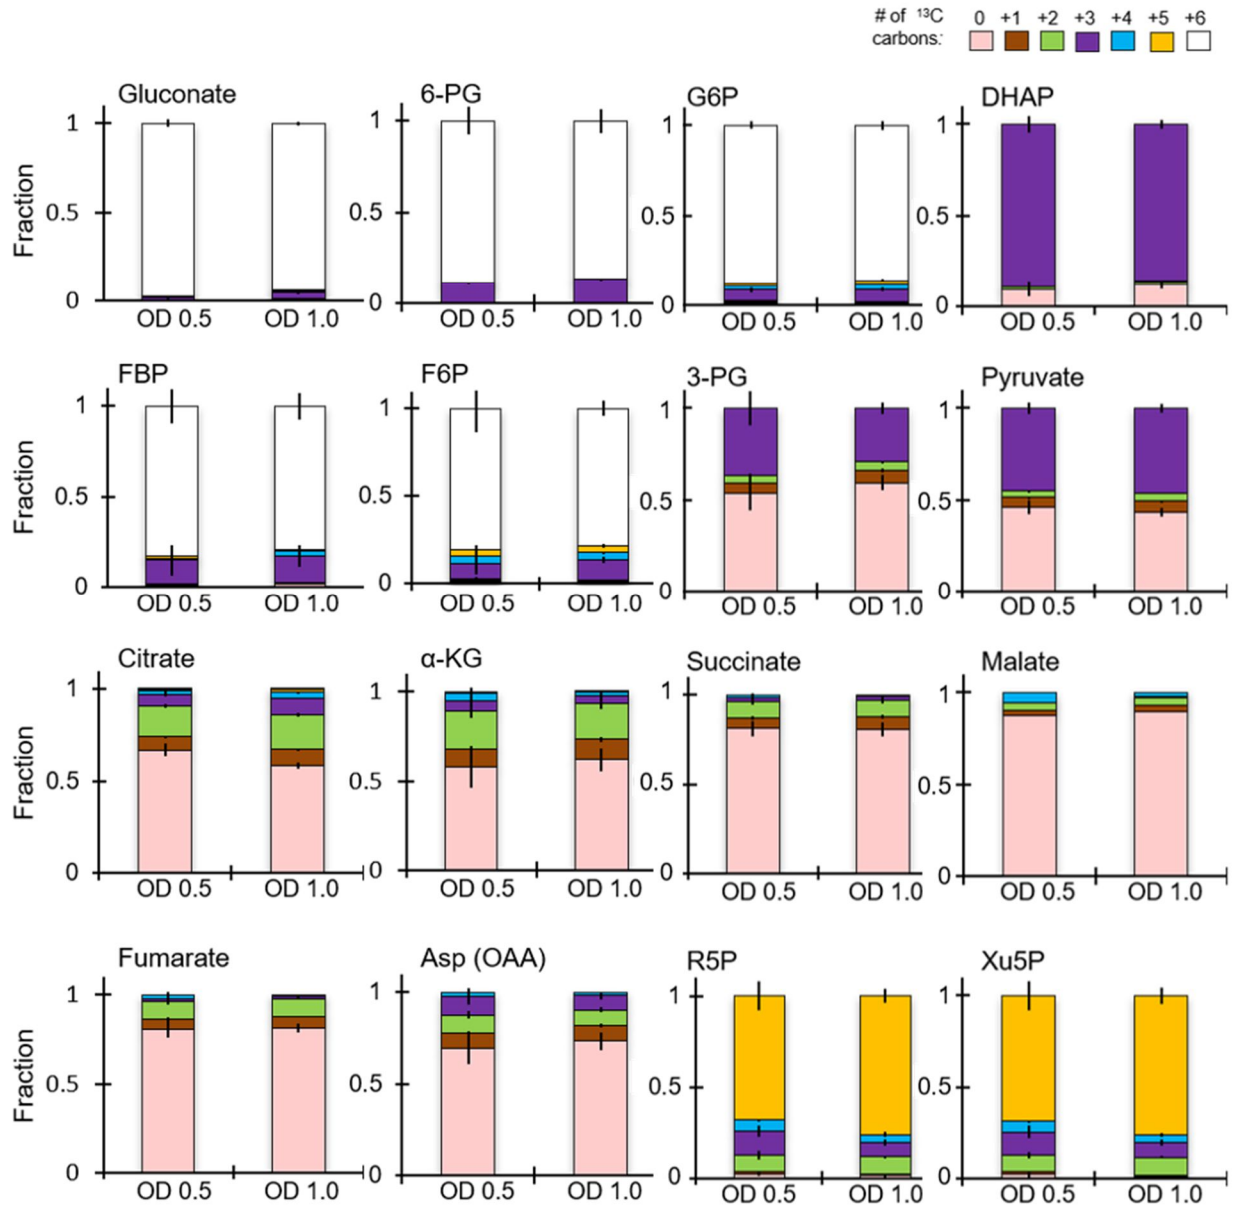

Supplementary Figure 3. Labeling profile of central carbon metabolites during growth on [U-<sup>13</sup>C<sub>6</sub>]-glucose with unlabeled benzoate. Error bars represent standard deviation obtained from three biological replicates. Refer to Fig. 1 (main text) for metabolite abbreviations.

## Appendix C

Supplementary Table 1. List of the transporters, enzymes and isozymes corresponding to gene annotations shown in Fig. 1. The information for the network was compiled from the databases BioCyc, MetaCyc, UniProt and several studies available in the literature (del Castillo et al., 2007; Sudarsan et al., 2014; Nikel et al., 2016). In the instances in which no gene name has been assigned, the PP number is given for each open reading frame.

| Open reading frame (ORF) no. | Gene annotation | Accession   | Description [NCBI]                                           |
|------------------------------|-----------------|-------------|--------------------------------------------------------------|
| PP_3168                      | benF            | NP_745312.1 | porin-like protein                                           |
| PP_3165                      | benK            | NP_745309.1 | benzoate MFS transporter                                     |
| PP_3163                      | benC            | NP_745307.1 | benzoate 1,2-dioxygenase electron transfer component         |
| PP_3162                      | benB            | NP_745306.1 | benzoate 1,2-dioxygenase subunit beta                        |
| PP_3161                      | benA            | NP_745305.1 | benzoate 1,2-dioxygenase subunit alpha                       |
| PP_3164                      | benD            | NP_745308.1 | 1,6-dihydroxycyclohexa-2,4-diene-1-carboxylate dehydrogenase |
| PP_3713                      | catA            | NP_745846.1 | catechol 1,2-dioxygenase                                     |
| PP_3715                      | catB            | NP_745848.1 | muconate cycloisomerase 1                                    |
| PP_3714                      | catC            | NP_745847.1 | muconolactone delta-isomerase                                |
| PP_1380                      | pcaD            | NP_743539.1 | 3-oxoadipate enol-lactonase 2                                |
| PP_3952                      | pcaJ            | NP_746082.1 | 3-oxoadipate CoA-transferase subunit A                       |
| PP_3951                      | pcaI            | NP_746081.1 | 3-oxoadipate CoA-transferase subunit A                       |
| PP_1377                      | pcaF            | NP_743536.1 | beta-ketoadipyl-CoA thiolase                                 |
| PP_1505                      | ppc             | NP_743662.1 | phosphoenolpyruvate carboxylase                              |
| PP_5346                      | OadA            | NP_747447.1 | pyruvate carboxylase subunit B                               |
| PP_5347                      | AccC-2          | NP_747448.1 | pyruvate carboxylase subunit A                               |
| PP_5085                      | maeB            | NP_747186.1 | malic enzyme B                                               |
| PP_2925                      | mqo3            | NP_745069.1 | malate:quinone oxidoreductase                                |
| PP_1251                      | mqo2            | NP_742912.1 | malate:quinone oxidoreductase                                |
| PP_0751                      | mqo1            | NP_743411.3 | malate:quinone oxidoreductase                                |

|         |        |             |                                                                                        |
|---------|--------|-------------|----------------------------------------------------------------------------------------|
| PP_0654 | mdh    | NP_742815.2 | malate dehydrogenase                                                                   |
| PP_1755 | fumC-2 | NP_743911.1 | class 2 fumarate hydratase                                                             |
| PP_0944 | fumC   | NP_743105.1 | class 2 fumarate hydratase                                                             |
| PP_4193 | sdhC   | NP_746310.1 | succinate dehydrogenase membrane b-556 subunit                                         |
| PP_4190 | sdhB   | NP_746307.1 | succinate dehydrogenase iron-sulfur subunit                                            |
| PP_4191 | sdhA   | NP_746308.1 | succinate dehydrogenase flavoprotein subunit                                           |
| PP_4185 | sucD   | NP_746302.1 | succinyl-CoA synthetase subunit alpha                                                  |
| PP_4186 | sucC   | NP_746303.1 | bifunctional succinyl-CoA synthetase subunit beta/glutaryl-CoA synthetase subunit beta |
| PP_5366 | lpd    | NP_747467.1 | dihydrolipoyl dehydrogenase                                                            |
| PP_4404 | lpdV   | NP_746518.1 | branched-chain alpha-keto acid dehydrogenase complex dihydrolipoyl dehydrogenase       |
| PP_4187 | lpdG   | NP_746304.1 | dihydrolipoyl dehydrogenase                                                            |
| PP_4188 | sucB   | NP_746305.1 | 2-oxoglutarate dehydrogenase dihydrolipoyltranssuccinylase subunit                     |
| PP_4189 | sucA   | NP_746306.1 | 2-oxoglutarate decarboxylase E1 component                                              |
| PP_4011 | icd    | NP_746141.1 | NADP(+)-specific isocitrate dehydrogenase                                              |
| PP_4012 | PP4012 | NP_746142.1 | isocitrate dehydrogenase                                                               |
| PP_2112 | acnA   | NP_744261.1 | aconitate hydratase                                                                    |
| PP_2339 | acnB   | NP_744488.1 | bifunctional aconitate hydratase 2/2-methylisocitrate dehydratase                      |
| PP_4194 | gltA   | NP_746311.1 | citrate synthase                                                                       |
| PP_0356 | glcB   | NP_742523.1 | malate synthase G                                                                      |
| PP_4116 | aceA   | NP_746235.1 | isocitrate lyase                                                                       |
| PP_4965 | tktA   | NP_747068.1 | transketolase A                                                                        |
| PP_2168 | tal    | NP_744317.1 | transaldolase                                                                          |
| PP_0415 | rpe    | NP_742581.2 | ribulose-5-phosphate 3-epimerase                                                       |
| PP_5150 | rpiA   | NP_747251.1 | ribose-5-phosphate isomerase A                                                         |
| PP_4043 | gnd    | NP_746169.1 | 6-phosphogluconate dehydrogenase                                                       |
| PP_4701 | pgi2   | NP_746810.1 | glucose 6-phosphate isomerase                                                          |

|         |        |             |                                                             |
|---------|--------|-------------|-------------------------------------------------------------|
| PP_1808 | pgi1   | NP_743963.1 | glucose 6-phosphate isomerase                               |
| PP_5040 | fbp    | NP_747141.1 | class 1 fructose-1,6-bisphosphatase                         |
| PP_4960 | fda    | NP_747063.1 | fructose-bisphosphate aldolase                              |
| PP_4715 | tpiA   | NP_746823.1 | triose phosphate isomerase                                  |
| PP_0338 | aceF   | NP_742505.1 | AceF-S-acetyldihydroliipoate                                |
| PP_0399 | aceE   | NP_742506.1 | pyruvate dehydrogenase E1 component                         |
| PP_4301 | pykF   | NP_746417.1 | pyruvate kinase                                             |
| PP_1362 | pykA   | NP_743521.1 | pyruvate kinase II                                          |
| PP_3082 | ppsA   | NP_744232.1 | phosphoenolpyruvate synthetase                              |
| PP_1612 | eno    | NP_743769.1 | enolase                                                     |
| PP_5056 | pgm    | NP_747157.1 | 2,3-bisphosphoglycerate-independent phosphoglycerate mutase |
| PP_4963 | pgk    | NP_747066.1 | phosphoglycerate kinase                                     |
| PP_3443 | PP3443 | NP_745581.1 | glyceraldehyde-3-phosphate dehydrogenase                    |
| PP_2149 | gap-2  | NP_744298.1 | glyceraldehyde-3-phosphate dehydrogenase                    |
| PP_1024 | eda    | NP_743185.1 | KHG/KDPG aldolase                                           |
| PP_1010 | edd    | NP_743171.1 | phosphogluconate dehydratase                                |
| PP_1022 | zwfA   | NP_743183.1 | glucose 6-phosphate-1-dehydrogenase                         |
| PP_5351 | Zwf    | NP_747452.1 | glucose 6-phosphate 1-dehydrogenase                         |
| PP_4042 | zwfB   | NP_746168.1 | glucose 6-phosphate 1-dehydrogenase                         |
| PP_3416 | gnuk   | NP_745554.1 | D-gluconate kinase                                          |
| PP_1011 | glk    | NP_743172.1 | glucokinase                                                 |
| PP_3376 | kguD   | NP_745516.1 | phosphonate dehydrogenase                                   |
| PP_3378 | kguK   | NP_745518.1 | 2-ketogluconokinase                                         |
| PP_3377 | kguT   | NP_745517.1 | 2-ketogluconate transporter, putative                       |
| PP_3383 | PP3383 | NP_745523.1 | gluconate 2-dehydrogenase flavoprotein subunit              |
| PP_3384 | PP3384 | NP_745524.1 | gluconate 2-dehydrogenase gamma subunit                     |
| PP_3382 | PP3382 | NP_745522.1 | gluconate 2-dehydrogenase cytochrome c subunit              |



|         |        |             |                                                           |
|---------|--------|-------------|-----------------------------------------------------------|
| PP_3417 | gntP   | NP_745555.1 | D-gluconate transporter                                   |
| PP_1444 | gcd    | NP_743602.1 | quinoprotein glucose dehydrogenase                        |
| PP_1018 | gtsD   | NP_743179.1 | mannose/glucose ABC transporter ATP binding protein       |
| PP_1017 | gtsC   | NP_743178.1 | mannose/glucose ABC transporter permease                  |
| PP_1016 | gtsB   | NP_743177.1 | mannose/glucose ABC transporter permease                  |
| PP_1015 | gtsA   | NP_743176.1 | mannose/glucose ABC transporter substrate-binding protein |
| PP_1019 | oprB-1 | NP_743180.1 | carbohydrate-selective porin                              |

---

## Appendix D

Supplementary Table 2. Intracellular metabolic rates determined from quantitative flux modeling of the metabolism of [1,5,6-<sup>13</sup>C<sub>3</sub>]-glucose alone or with unlabeled benzoate by *P. putida* KT2440 using the 13CFLUX2 software. These metabolic fluxes are illustrated in Fig. 4. The grey boxes indicate the absence of that reaction. Refer to the legends of Fig (main text) 1 for the metabolite abbreviations.

| Reactions                                       | Glucose                                 | Glucose:Benzoate |
|-------------------------------------------------|-----------------------------------------|------------------|
|                                                 | mmol gCDW <sup>-1</sup> h <sup>-1</sup> |                  |
| Gluc <sub>ext</sub> → Gluc <sub>peri</sub>      | 8.09 ± 0.01                             | 3.26 ± 0.14      |
| Gluc <sub>peri</sub> → G6P                      | 0.92 ± 0.31                             | 0.60 ± 0.47      |
| Gluc <sub>peri</sub> → Glucn <sub>peri</sub>    | 7.17 ± 0.31                             | 2.66 ± 0.34      |
| Glucn <sub>peri</sub> → 6-PG                    | 5.06 ± 0.17                             | 2.07 ± 0.31      |
| Glucn <sub>peri</sub> → 2KGlucn <sub>peri</sub> | 0.90 ± 0.14                             | 0.46 ± 0.03      |
| 2KGlucn <sub>peri</sub> → 6-PG                  | 0.90 ± 0.14                             | 0.46 ± 0.03      |
| G6P → 6-PG                                      | 1.30 ± 0.33                             | 1.15 ± 1.02      |
| 6-PG → Pyruvate + GAP                           | 7.16 ± 0.02                             | 3.24 ± 0.48      |
| GAP → 3PG                                       | 5.38 ± 0.03                             | 0.52 ± 0.17      |
| 3PG → PEP                                       | 4.30 ± 0.03                             | -0.41 ± 0.10     |
| PEP → Pyruvate                                  | 4.85 ± 0.03                             | -0.22 ± 0.07     |
| DHAP → GAP                                      | 0.79 ± 0.02                             | 1.19 ± 0.36      |
| FBP → DHAP + GAP                                | 0.71 ± 0.15                             | 1.11 ± 0.26      |
| FBP → F6P                                       | 0.71 ± 0.02                             | 1.11 ± 0.37      |
| F6P → G6P                                       | 0.49 ± 0.02                             | 0.66 ± 0.54      |
| 6-PG → Ru5P + CO <sub>2</sub>                   | 0.10 ± 0.01                             | 0.31 ± 0.20      |
| Ru5P → Xu5P                                     | -0.22 ± 0.01                            | -0.57 ± 0.17     |
| Ru5P → R5P                                      | 0.32 ± 0.01                             | 0.88 ± 0.03      |
| Xu5P + R5P → GAP + S7P                          | 0.05 ± 0.01                             | -0.10 ± 0.41     |
| S7P + GAP → E4P + F6P                           | 0.05 ± 0.01                             | -0.10 ± 0.41     |
| F6P + GAP → E4P + Xu5P                          | 0.27 ± 0.02                             | 0.47 ± 0.08      |
| Pyruvate → Acetyl-CoA + CO <sub>2</sub>         | 8.41 ± 0.04                             | 3.52 ± 0.97      |
| Pyruvate + CO <sub>2</sub> → OAA                | 6.97 ± 0.05                             | -0.03 ± 0.12     |
| OAA → PEP + CO <sub>2</sub>                     | 1.24 ± 0.01                             | 0.92 ± 0.09      |
| OAA + Acetyl-CoA → Citrate                      | 8.41 ± 0.04                             | 6.11 ± 1.28      |
| Citrate → α-KG                                  | 8.41 ± 0.04                             | 4.41 ± 3.39      |
| α-KG → Succinate + CO <sub>2</sub>              | 7.80 ± 0.05                             | 3.31 ± 3.48      |
| Succinate → Fumarate                            | 7.78 ± 0.04                             | 9.84 ± 1.07      |
| Fumarate → Malate                               | 7.86 ± 0.04                             | 9.54 ± 1.40      |
| Malate → OAA                                    | 3.63 ± 0.03                             | 8.75 ± 0.83      |
| Malate → Pyruvate + CO <sub>2</sub>             | 4.24 ± 0.09                             | 2.77 ± 0.96      |
| OAA → Fumarate                                  | 0.08 ± 0.01                             | 0.05 ± 0.03      |
| Benz → Benz <sub>peri</sub>                     |                                         | 4.57 ± 0.14      |
| Benz → Acetyl-CoA + Succinate                   |                                         | 4.57 ± 0.14      |

|                                  |             |             |
|----------------------------------|-------------|-------------|
| Citrate → Glyoxylate + Succinate | 0.00 ± 0.00 | 3.46 ± 0.01 |
| Glyoxylate + Acetyl-CoA → Malate | 0.00 ± 0.00 | 3.47 ± 0.01 |

Supplementary Table 3. Biomass and excretion efflux rates of metabolites determined from quantitative flux modeling of the metabolism of [1,5,6-<sup>13</sup>C<sub>3</sub>]-glucose alone or with unlabeled benzoate by *P. putida* KT2440 using the 13CFLUX2 software. These metabolic fluxes are illustrated in Fig. 4. Refer to the legends of Fig 1 (main text) for the metabolite abbreviations.

| Reactions                                              | Glucose                                 | Glucose:Benzoate |
|--------------------------------------------------------|-----------------------------------------|------------------|
|                                                        | mmol gCDW <sup>-1</sup> h <sup>-1</sup> |                  |
| DHAP → Biomass                                         | 0.082 ± 0.0003                          | 0.081 ± 0.009    |
| E4P → Biomass                                          | 0.321 ± 0.0004                          | 0.379 ± 0.012    |
| G6P → Biomass                                          | 0.104 ± 0.001                           | 0.106 ± 0.012    |
| PEP → Biomass                                          | 0.680 ± 0.001                           | 0.720 ± 0.064    |
| Pyruvate → Biomass                                     | 0.873 ± 0.021                           | 2.298 ± 0.437    |
| R5P → Biomass                                          | 0.275 ± 0.001                           | 0.980 ± 0.061    |
| 3PG → Biomass                                          | 1.083 ± 0.0004                          | 0.933 ± 0.267    |
| OAA → Biomass                                          | 0.869 ± 0.017                           | 1.641 ± 0.210    |
| α-KG → Biomass                                         | 0.605 ± 0.008                           | 0.814 ± 0.092    |
| Glucn <sub>in</sub> → Glucn <sub>ext</sub>             | 1.209 ± 0.002                           | 0.127 ± 0.008    |
| 2-ketoglucn <sub>in</sub> → 2-ketoglucn <sub>ext</sub> | 0.003 ± 0.0001                          | 0.003 ± 0.000    |
| F6P <sub>in</sub> → F6P <sub>ext</sub>                 | 0.001 ± 0.000                           | 0.0001 ± 0.000   |
| G6P <sub>in</sub> → G6P <sub>ext</sub>                 | 0.001 ± 0.000                           | 0.0001 ± 0.000   |
| R5P <sub>in</sub> → R5P <sub>ext</sub>                 | 0.002 ± 0.0001                          | 0.000 ± 0.000    |
| α-KG <sub>in</sub> → α-KG <sub>ext</sub>               | 0.007 ± 0.005                           | 0.018 ± 0.0003   |
| Fumarate <sub>in</sub> → Fumarate <sub>ext</sub>       | 0.000 ± 0.000                           | 0.353 ± 0.495    |
| Malate <sub>in</sub> → Malate <sub>ext</sub>           | 0.0004 ± 0.000                          | 0.000 ± 0.000    |
| Succinate <sub>in</sub> → Succinate <sub>ext</sub>     | 0.015 ± 0.003                           | 0.008 ± 0.0002   |

## Appendix E

Supplementary Table 4. Fold changes of protein abundance and metabolic fluxes in *Pseudomonas putida* KT2440 cells grown on glucose:benzoate mixture with respect to cells grown solely on glucose. Refer to the legends of Fig 1 (main text) for the metabolite abbreviations.

| Reactions                                     | ORF number | Protein | Protein abundance | Protein Phosphorylation              |      | Metabolic Flux |
|-----------------------------------------------|------------|---------|-------------------|--------------------------------------|------|----------------|
|                                               |            |         |                   | (Glucose:Benzoate)/Glucose Abundance | Site |                |
| Gluc <sub>ext</sub> → Gluc <sub>peri</sub>    | PP_1019    | OPRB-1  | 0.83 ± 0.17       | n/a                                  | n/a  | 0.42 ± 0.002   |
| Gluc <sub>ext</sub> → G6P                     | PP_0795    | FRUA    | 1.01 ± 0.14       | n/a                                  | n/a  | 0.43 ± 0.07    |
|                                               | PP_1018    | GTSD    | 0.77 ± 0.24       | n/a                                  | n/a  | 0.72 ± 0.50    |
| Gluc <sub>peri</sub> → Gluc                   | PP_1017    | GTSC    | 0.93 ± 0.35       | n/a                                  | n/a  | 0.72 ± 0.50    |
|                                               | PP_1016    | GTSB    | 1.00 ± 0.44       | n/a                                  | n/a  | 0.72 ± 0.50    |
|                                               | PP_1015    | GTSA    | 0.68 ± 0.15       | n/a                                  | n/a  | 0.72 ± 0.50    |
| Gluc <sub>peri</sub> → G6P                    | PP_1011    | GLK     | 1.01 ± 0.15       | n/a                                  | n/a  | 0.72 ± 0.50    |
| Gluc <sub>peri</sub> → Gluc <sub>peri</sub>   | PP_1444    | GCD     | 0.92 ± 0.07       | n/a                                  | n/a  | 0.39 ± 0.05    |
| Gluc <sub>peri</sub> → Glucn                  | PP_3417    | GNTP    | 0.97 ± 0.25       | n/a                                  | n/a  | 0.43 ± 0.07    |
| Gluc <sub>peri</sub> → 6-PG                   | PP_3416    | GNUK    | 0.95 ± 0.25       | n/a                                  | n/a  | 0.43 ± 0.07    |
|                                               | PP_3383    | n/a     | 0.79 ± 0.38       | n/a                                  | n/a  | 0.52 ± 0.08    |
| Gluc <sub>peri</sub> → 2KGluc <sub>peri</sub> | PP_3384    | n/a     | 0.77 ± 0.31       | n/a                                  | n/a  | 0.52 ± 0.08    |
|                                               | PP_3382    | n/a     | 0.77 ± 0.37       | n/a                                  | n/a  | 0.52 ± 0.08    |
| 2KGluc <sub>peri</sub> → 2KGlucn              | PP_3377    | KGUT    | 0.79 ± 0.39       | n/a                                  | n/a  | 0.55 ± 0.08    |
| 2-KGlucn → 2KGlucnP                           | PP_3378    | KGUK    | 0.73 ± 0.31       | n/a                                  | n/a  | 0.55 ± 0.08    |
| 2KGlucnP → 6-PG                               | PP_3376    | KGUD    | 0.75 ± 0.23       | n/a                                  | n/a  | 0.55 ± 0.08    |
|                                               | PP_1022    | ZWFA    | 0.92 ± 0.31       | n/a                                  | n/a  | 0.95 ± 0.71    |
| G6P → 6-PG                                    | PP_5351    | ZWF     | 0.88 ± 0.10       | n/a                                  | n/a  | 0.95 ± 0.71    |
|                                               | PP_4042    | ZWFB    | 0.89 ± 0.10       | n/a                                  | n/a  | 0.95 ± 0.71    |
| 6-PG → KDPG                                   | PP_1010    | EDD     | 0.97 ± 0.29       | n/a                                  | n/a  | 0.47 ± 0.04    |
| KDPG → Pyruvate + GAP                         | PP_1024    | EDA     | 0.94 ± 0.24       | n/a                                  | n/a  | 0.47 ± 0.04    |
|                                               | PP_3443    | n/a     | 0.71 ± 0.11       | n/a                                  | n/a  | 0.10 ± 0.03    |
| GAP → 1,3-bisPG                               | PP_2149    | GAP-2   | 1.04 ± 0.11       | n/a                                  | n/a  | 0.10 ± 0.03    |
| 1,3-bisPG → 3PG                               | PP_4963    | PGK     | 1.09 ± 0.05       | n/a                                  | n/a  | 0.10 ± 0.03    |
| 2PG ↔ 3PG                                     | PP_5056    | PGM     | 1.06 ± 0.08       | n/a                                  | n/a  | -0.10 ± 0.02   |
| 2-PG ↔ PEP                                    | PP_1612    | ENO     | 0.96 ± 0.04       | n/a                                  | n/a  | -0.10 ± 0.02   |
| Pyruvate → PEP                                | PP_2082    | PPSA    | 0.87 ± 0.07       | 0.643                                | T416 | -0.05 ± 0.01   |
|                                               | PP_4301    | PYKF    | 0.92 ± 0.10       | n/a                                  | n/a  | -0.05 ± 0.01   |
| PEP → Pyruvate                                | PP_1362    | PYKA    | 0.94 ± 0.05       | n/a                                  | n/a  | -0.05 ± 0.01   |
| DHAP ↔ GAP                                    | PP_4715    | TPIA    | 0.95 ± 0.05       | n/a                                  | n/a  | 1.57 ± 0.34    |
| FBP ↔ DHAP + GAP                              | PP_4960    | FDA     | 1.06 ± 0.07       | n/a                                  | n/a  | 1.78 ± 0.49    |
| FBP → F6P                                     | PP_5040    | FBP     | 1.09 ± 0.05       | n/a                                  | n/a  | 1.63 ± 0.40    |
|                                               | PP_4701    | PGI2    | 0.89 ± 0.11       | n/a                                  | n/a  | 1.40 ± 0.91    |
| G6P ↔ F6P                                     | PP_1808    | PGI1    | 1.13 ± 0.06       | n/a                                  | n/a  | 1.40 ± 0.91    |

|                                                               |         |        |             |      |      |              |
|---------------------------------------------------------------|---------|--------|-------------|------|------|--------------|
| 6-PG → Ru5P + CO <sub>2</sub>                                 | PP_4043 | GND    | 0.99 ± 0.12 | n/a  | n/a  | 3.19 ± 0.06  |
| Ru5P ↔ R5P                                                    | PP_5150 | RPIA   | 1.16 ± 0.06 | n/a  | n/a  | 2.86 ± 0.07  |
| Ru5P ↔ Xu5P                                                   | PP_0415 | RPE    | 1.03 ± 0.08 | n/a  | n/a  | 2.71 ± 0.07  |
| Xu5P + R5P ↔ GAP + S7P                                        | PP_4965 | TKTA   | 1.07 ± 0.05 | n/a  | n/a  | -2.12 ± 0.12 |
| S7P + GAP ↔ E4P + F6P                                         | PP_2168 | TAL    | 0.86 ± 0.12 | n/a  | n/a  | -2.12 ± 0.12 |
| F6P + GAP ↔ E4P + Xu5P                                        | PP_4965 | TKTA   | 1.07 ± 0.05 | n/a  | n/a  | 1.82 ± 0.06  |
| Pyruvate → Acetyl-CoA + CO <sub>2</sub>                       | PP_0338 | ACEF   | 0.97 ± 0.10 | 1.25 | S826 | 0.44 ± 0.11  |
|                                                               | PP_0399 | ACEE   | 0.98 ± 0.07 | n/a  | n/a  | 0.44 ± 0.11  |
| OAA → Pyruvate + CO <sub>2</sub>                              | PP_1505 | PPC    | 0.85 ± 0.10 | n/a  | n/a  | 0.78 ± 0.02  |
| Pyruvate → CO <sub>2</sub> → OAA                              | PP_5347 | OADA   | 0.87 ± 0.24 | n/a  | n/a  | 0.78 ± 0.02  |
|                                                               | PP_5346 | ACCC2  | 0.86 ± 0.30 | n/a  | n/a  | 0.78 ± 0.02  |
| OAA → PEP + CO <sub>2</sub>                                   | PP_1505 | PPC    | 0.85 ± 0.10 | n/a  | n/a  | 0.78 ± 0.09  |
| OAA + Acetyl-CoA → Citrate                                    | PP_4194 | GLTA   | 1.18 ± 0.06 | n/a  | n/a  | 0.76 ± 0.11  |
| Citrate → <i>Cis</i> -aconitate                               | PP_2112 | ACNA   | 0.74 ± 0.05 | n/a  | n/a  | 0.76 ± 0.11  |
|                                                               | PP_2339 | ACNB   | 1.10 ± 0.04 | n/a  | n/a  | 0.76 ± 0.11  |
| <i>Cis</i> -aconitate → <i>Isocitrate</i>                     | PP_2112 | ACNA   | 0.74 ± 0.05 | n/a  | n/a  | 0.76 ± 0.11  |
|                                                               | PP_2339 | ACNB   | 1.10 ± 0.04 | n/a  | n/a  | 0.76 ± 0.11  |
| <i>Isocitrate</i> → α-KG                                      | PP_4011 | ICD    | 0.65 ± 0.07 | n/a  | n/a  | 0.51 ± 0.33  |
|                                                               | PP_4012 | n/a    | 1.04 ± 0.05 | 0.46 | S115 | 0.51 ± 0.33  |
|                                                               | PP_5366 | LPD    | 0.84 ± 0.12 | n/a  | n/a  | 0.44 ± 0.37  |
|                                                               | PP_4404 | IPDV   | 0.78 ± 0.09 | n/a  | n/a  | 0.44 ± 0.37  |
| α-KG → Succinyl-CoA + CO <sub>2</sub>                         | PP_4187 | LPDG   | 1.10 ± 0.15 | n/a  | n/a  | 0.44 ± 0.37  |
|                                                               | PP_4188 | SUCB   | 1.03 ± 0.10 | n/a  | n/a  | 0.44 ± 0.37  |
|                                                               | PP_4189 | SUCA   | 1.08 ± 0.12 | n/a  | n/a  | 0.44 ± 0.37  |
| Succinyl-CoA → Succinate                                      | PP_4185 | SUCD   | 1.05 ± 0.14 | n/a  | n/a  | 0.44 ± 0.37  |
|                                                               | PP_4186 | SUCC   | 1.06 ± 0.08 | n/a  | n/a  | 0.44 ± 0.37  |
| Succinate → Fumarate                                          | PP_4193 | SDHC   | 1.62 ± 0.38 | n/a  | n/a  | 2.66 ± 0.18  |
|                                                               | PP_4190 | SDHB   | 1.58 ± 0.07 | n/a  | n/a  | 2.66 ± 0.18  |
|                                                               | PP_4191 | SDHA   | 1.40 ± 0.07 | n/a  | n/a  | 2.66 ± 0.18  |
| Fumarate → Malate                                             | PP_1755 | FUMC-2 | 0.84 ± 0.11 | n/a  | n/a  | 2.55 ± 0.25  |
|                                                               | PP_0944 | FUMC   | 0.82 ± 0.32 | n/a  | n/a  | 2.55 ± 0.25  |
| Malate + NAD(P) <sup>+</sup> ↔ OAA + NAD(P)H + H <sup>+</sup> | PP_0654 | MDH    | 1.07 ± 0.13 | n/a  | n/a  | 2.54 ± 0.12  |
|                                                               | PP_2925 | MQO3   | 0.79 ± 0.14 | n/a  | n/a  | 2.54 ± 0.12  |
| Malate + a quinone → oxaloacetate + a quinol                  | PP_1251 | MQO2   | 0.97 ± 0.06 | n/a  | n/a  | 2.54 ± 0.12  |
|                                                               | PP_0751 | MQO1   | 1.38 ± 0.30 | n/a  | n/a  | 2.54 ± 0.12  |
| Malate → Pyruvate + CO <sub>2</sub>                           | PP_5085 | MAEB   | 0.86 ± 0.07 | n/a  | n/a  | 0.69 ± 0.00  |
| Benzoate <sub>ext</sub> → Benzoate <sub>peri</sub>            | PP_3168 | BENF   | 1.45 ± 0.44 | n/a  | n/a  | n/a          |
| Benzoate <sub>peri</sub> → Benzoate                           | PP_3165 | BENK   | 1.15 ± 0.21 | n/a  | n/a  | n/a          |
|                                                               | PP_3163 | BENC   | 1.53 ± 0.42 | n/a  | n/a  | n/a          |
| Benzoate → Benz-1,2-diol                                      | PP_3162 | BENB   | 1.60 ± 0.52 | n/a  | n/a  | n/a          |
|                                                               | PP_3161 | BENA   | 1.67 ± 0.52 | n/a  | n/a  | n/a          |
| Benz-1,2-diol → Catechol + CO <sub>2</sub>                    | PP_3164 | BEND   | 1.38 ± 0.42 | n/a  | n/a  | n/a          |

|                                                 |         |      |             |     |     |     |
|-------------------------------------------------|---------|------|-------------|-----|-----|-----|
| Catechol → <i>cis,cis</i> -Muconate             | PP_3713 | CATA | 1.65 ± 0.46 | n/a | n/a | n/a |
| <i>cis,cis</i> -Muconate →<br>Muconolactone     | PP_3715 | CATB | 1.44 ± 0.44 | n/a | n/a | n/a |
| Muconolactone → 4-ketoadipate<br>enol-lactone   | PP_3714 | CATC | 2.03 ± 0.90 | n/a | n/a | n/a |
| 4-ketoadipate enol-lactone → 3-<br>ketoadipate  | PP_1380 | PCAD | 1.55 ± 0.46 | n/a | n/a | n/a |
| 3-ketoadipate → 3-ketoadipyl-<br>CoA            | PP_3952 | PCAJ | 1.50 ± 0.42 | n/a | n/a | n/a |
|                                                 | PP_3951 | PCAI | 1.29 ± 0.33 | n/a | n/a | n/a |
| 3-ketoadipyl-CoA → Succinyl-CoA<br>+ Acetyl-CoA | PP_1377 | PCAF | 1.34 ± 0.33 | n/a | n/a | n/a |
| Citrate → Glyoxylate + Succinate                | PP_0356 | GLCB | 0.83 ± 0.09 | n/a | n/a | n/a |
| Glyoxylate + Acetyl-CoA →<br>Malate             | PP_4116 | ACEA | 0.68 ± 0.14 | n/a | n/a | n/a |

---

## Appendix F

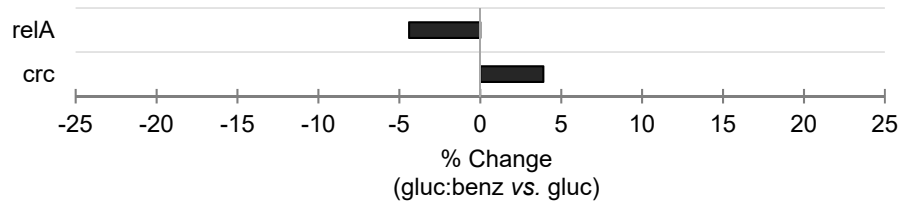

Supplementary Figure 4. Percent change of catabolite repressor proteins by comparing cells fed on both glucose and benzoate to cells fed on glucose alone. Data were obtained from three biological replicates. Note: Only PTSN and CRC, out of five proteins (RELA, CYOB, CRP, PTSN, and CRC) previously investigated for exerting possible catabolite repression in *P. putida* KT2440 (del Castillo et al., 2007), were confirmed to play a role in catabolic repression (Ruiz-Manzano et al., 2005; del Castillo et al., 2007): PTSN repressed the pathway for initial aromatic substrate catabolism; CRC repressed reactions in initial glucose catabolism.

## Appendix G

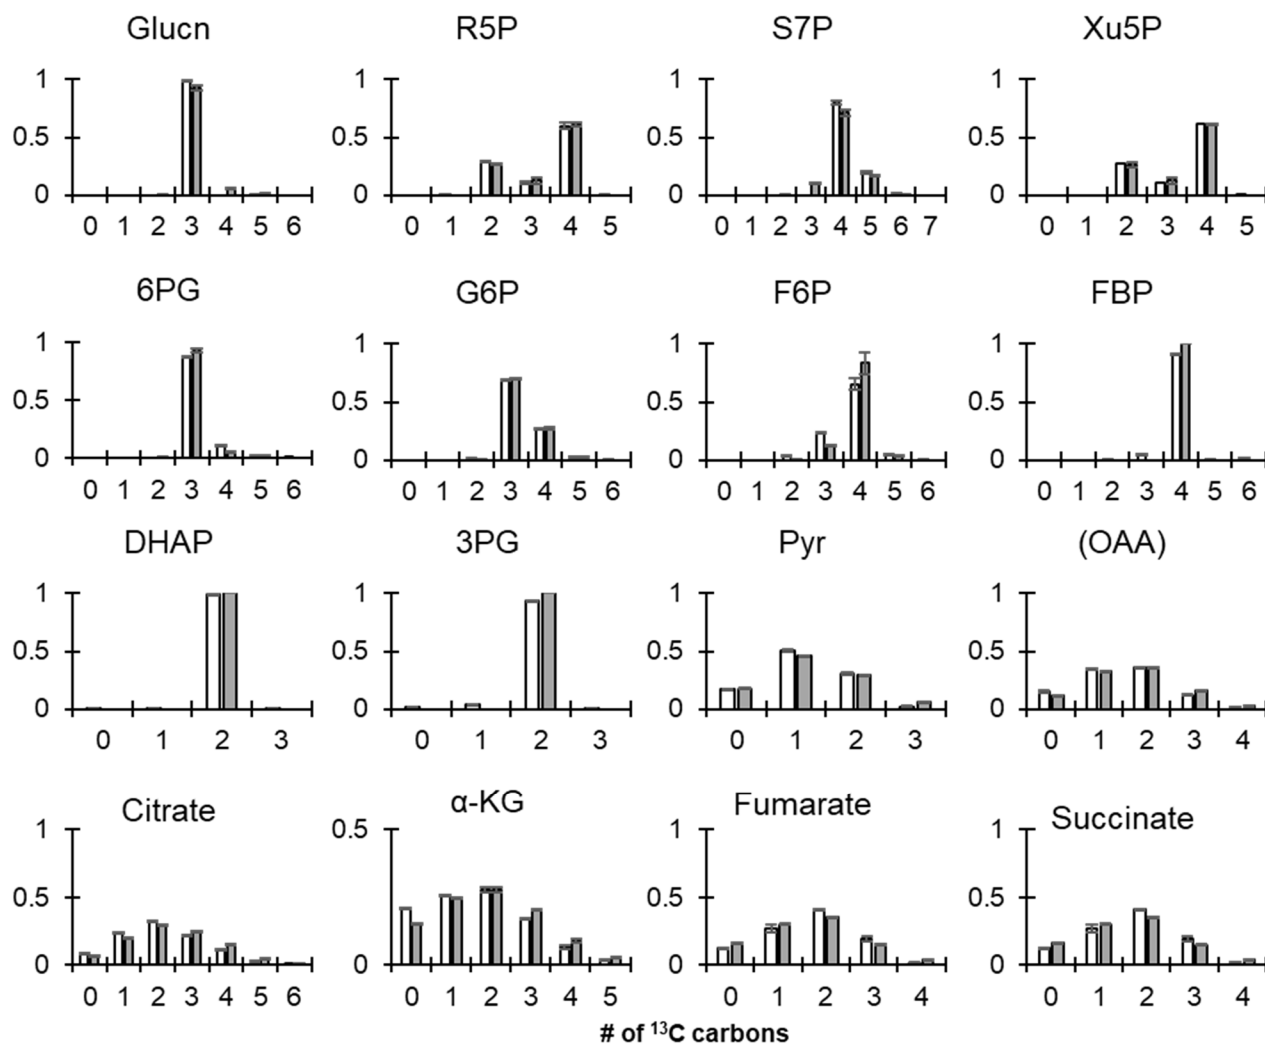

Supplementary Figure 5. Experimentally-determined (white bars) and model-estimated (grey bars) of isotopologue distributions in the carbon labeling patterns of selected metabolites in *P. putida* KT2440 cells grown on [1,5,6- $^{13}\text{C}_3$ ]-glucose. Data presented is the average of two independent optimizations of experimental data with two model predictions, both shown with standard deviation error bars. Refer to Fig. 1 (main text) for metabolite abbreviations.



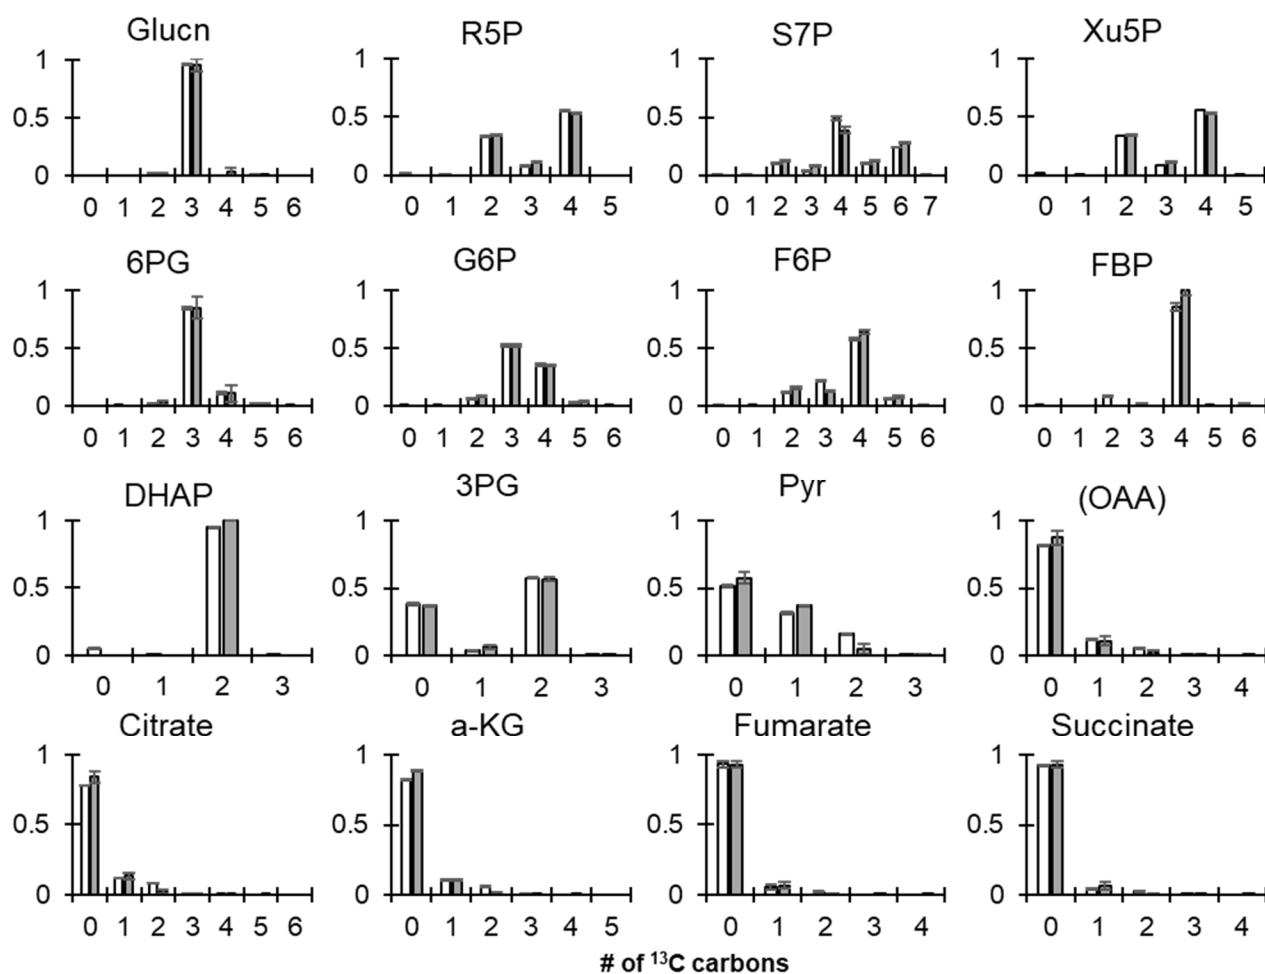

Supplementary Figure 6. Experimentally-determined (white bars) and model-estimated (grey bars) of isotopologue distributions in the carbon labeling patterns of selected metabolites in *P. putida* KT2440 cells grown on [1,5,6- $^{13}\text{C}_3$ ]-glucose with unlabeled benzoate. Data presented is the average of two independent optimizations of experimental data with two model predictions, both shown with standard deviation error bars. Refer to Fig. 1 (main text) for metabolite abbreviations.

## References:

- Ruiz-Manzano, A., Yuste, L. & Rojo, F. Levels and Activity of the *Pseudomonas putida* Global Regulatory Protein Crc Vary According to Growth Conditions. *J. Bacteriol.* **187**, 3678–3686 (2005).
- Del Castillo, T. & Ramos, J. L. Simultaneous catabolite repression between glucose and toluene metabolism in *Pseudomonas putida* is channeled through different signaling pathways. *J. Bacteriol.* **189**, 6602–6610 (2007).
- Sudarsan, S., Dethlefsen, S., Blank, L. M., Siemann-Herzberg, M. & Schmid, A. The Functional Structure of Central Carbon Metabolism in *Pseudomonas putida* KT2440. *Appl. Environ. Microbiol.* **80**, 5292–5303 (2014).
- Nikel, P. I., Chavarría, M., Fuhrer, T., Sauer, U. & De Lorenzo, V. *Pseudomonas putida* KT2440 strain metabolizes glucose through a cycle formed by enzymes of the Entner-Doudoroff, embden-meyerhof-parnas, and pentose phosphate pathways. *J. Biol. Chem.* **290**, 25920–25932 (2015).
